# Supplementary material for: Antithymocyte globulin improves the survival of patients with myelodysplastic syndrome undergoing HLA-matched unrelated donor and haplo-identical donor transplants
Source: PubMed Central journal article supplement (PMC5337979; doi:10.1038/srep43488), 2017-03-06
Supplement: srep43488-s1.pdf [file srep43488-s1.pdf]

## Supplement file

**Title:** Antithymocyte globulin improves the survival of patients with myelodysplastic syndrome undergoing HLA-matched unrelated donor and haplo-identical donor transplants

Hong Wang<sup>1,+</sup>, Hong Liu<sup>1,+</sup>, Jin-Yi Zhou<sup>1,+</sup>, Tong-Tong Zhang<sup>1</sup>, Song Jin<sup>1</sup>, Xiang Zhang<sup>1</sup>, Su-Ning Chen<sup>1</sup>, Wei-Yang Li<sup>1</sup>, Yang Xu<sup>1</sup>; Miao Miao<sup>1,\*</sup> & De-Pei Wu<sup>1,\*</sup>

## 1) Patient clinical characteristics

---

| Variables                        | No.        |
|----------------------------------|------------|
| <b>Sex (n=85)</b>                |            |
| Male/Female                      | 53/32      |
| <b>Age (n=85)</b>                |            |
| Median (range)                   | 39 (12-59) |
| <b>WHO classification (n=85)</b> |            |
| RCUD                             | 8          |
| RCMD                             | 28         |
| MDS-U                            | 2          |
| RAEB-1                           | 22         |
| RAEB-2                           | 25         |
| <b>IPSS (n=84)</b>               |            |
| Low                              | 1          |
| Int-1                            | 46         |
| Int2                             | 27         |
| High                             | 10         |
| <b>Karyotype (n=84)</b>          |            |
| Good                             | 47         |

---

---

|                                 |    |
|---------------------------------|----|
| Int                             | 28 |
| Poor                            | 9  |
| <b>Conditioning (n=85)</b>      |    |
| MAC                             | 78 |
| RIC                             | 7  |
| <b>Stem cell source (n=85)</b>  |    |
| Marrow                          | 17 |
| PBSCs                           | 43 |
| Marrow+PBSCs                    | 24 |
| Cord                            | 1  |
| <b>Therapies pre-HSCT(n=85)</b> |    |
| DAC±chemotherapy                | 43 |
| BSC                             | 42 |
| <b>CR Pre-HSCT(n=85)</b>        |    |
| Yes                             | 13 |
| No                              | 72 |
| <b>Secondary MDS (n=85)</b>     |    |
| Yes                             | 12 |
| No                              | 73 |
| <b>ATG (n=85)</b>               |    |
| Yes                             | 39 |
| No                              | 46 |
| <b>Progression pre-HSCT</b>     |    |
| (n=85)                          |    |
| Yes                             | 16 |
| No                              | 69 |
| <b>Donor type (n=85)</b>        |    |
| MSDs                            | 38 |
| MUDs                            | 29 |

---

---

MAC: myeloablative conditioning; RIC: reduced intensive conditioning; DAC: decitabine; BSC: basic supportive care, including erythropoiesis-stimulating agent and blood transfusion; Secondary MDS: MDS that transformed from chronic aplastic anemia; ATG: Rabbitantithymocyte globulin; Progression pre-HSCT: MDS that progressed to advanced stage or AML; MSDs: matched sibling donors; MUDs: matched unrelated donors ; HIDs: haplo-identical donors.

## 2) Conditioning regimens in allo-HSCT

For MSDT, pre-transplant MAC regimens comprised semustine ( $250\text{mg}/\text{m}^2$ , day  $-10$ ), cytarabine ( $2\text{g}/\text{m}^2/\text{d}$  days  $-9$  to  $-8$ ), busulfan ( $3.2\text{ mg}/\text{kg}/\text{d}$  days  $-7$  to  $-5$ ), cyclophosphamide ( $1.8\text{ g}/\text{m}^2/\text{d}$  days  $-4$  to  $-3$ ). For non-MSDT (MUDT and HIDs), patients received a regimen identical to that for MSDT apart from receiving higher doses of cytarabine ( $4\text{ g}/\text{m}^2/\text{d}$  days  $-9$  to  $-8$ ). In addition, patients receiving MUDT also received hydroxycarbamide ( $80\text{mg}/\text{kg}$ , day  $-10$ ). Rabbit ATG (Thymoglobulin; Imtix Sangstat, Lyon, France) was administered to patients receiving MUDT ( $10\text{ mg}/\text{kg}$  total dose, days  $-5$  to  $-2$ ) and HIDs ( $10\text{ mg}/\text{kg}$  total dose, days  $-6$  to  $-3$ ).

The RIC comprised semustine ( $250\text{ mg}/\text{m}^2$ , day  $-10$ ), fludarabine ( $30\text{ mg}/\text{m}^2/\text{day}$ , days  $-10$  to  $-6$ ), cytarabine ( $1.5\text{ g}/\text{m}^2/\text{d}$  days  $-10$  to  $-6$ ), and busulfan ( $3.2\text{ mg}/\text{kg}/\text{d}$  days  $-5$  to  $-3$ ). Additionally, ATG was used in patients receiving MUDT ( $6\text{ mg}/\text{kg}$  total dose, days  $-4$  to  $-1$ ).
